# Supplementary material for: Regulation of carbon content in MOF-derived hierarchical-porous NiO@C films for high-performance electrochromism
Source: Royal Society of Chemistry journal article supplement (doi:10.1039/c8mh01091a), 2018-12-07
Supplement: c8mh01091a1.pdf [file c8mh01091a1.pdf]

## Electronic Supplementary Information

### Regulation of carbon content in MOF-derived hierarchical-porous NiO@C films for high-performance electrochromic

Hao Liang,<sup>a</sup> Ran Li,<sup>a</sup> Ce Li,<sup>c</sup> Chengyi Hou,<sup>\*a</sup> Yaogang Li,<sup>\*b</sup> Qinghong Zhang<sup>b</sup> and Hongzhi Wang<sup>a</sup>

---

<sup>a.</sup> State Key Laboratory for Modification of Chemical Fibers and Polymer Materials, College of Materials Science and Engineering, Donghua University, Shanghai 201620, P. R. China. E-mail: [hcy@dhu.edu.cn](mailto:hcy@dhu.edu.cn)

<sup>b.</sup> Engineering Research Center of Advanced Glasses Manufacturing Technology, Ministry of Education, Donghua University, Shanghai 201620, P. R. China. E-mail: [yaogang\\_li@dhu.edu.cn](mailto:yaogang_li@dhu.edu.cn)

<sup>c.</sup> College of Mechanical Engineering, Donghua University, Shanghai 201620, P. R. China.

Keywords: electrochromic, metal-organic framework, nickel oxide, thermolysis, carbon

## Contents

|                                                                                                                                               |    |
|-----------------------------------------------------------------------------------------------------------------------------------------------|----|
| Supplementary discussion.....                                                                                                                 | 3  |
| S1. Thermogravimetric analysis.....                                                                                                           | 3  |
| S2. Calculation process of $D_w$ and $D_{CV}$ .....                                                                                           | 3  |
| Supplementary Figures.....                                                                                                                    | 3  |
| Fig. S1 TGA traces of Ni@C and Ni-MOF.....                                                                                                    | 3  |
| Fig. S2 Cross-sectional SEM images of Ni-MOF, Ni@C and hierarchical-porous NiO@C films.....                                                   | 4  |
| Fig. S3 SEM images of A-10, A-30 and A-60 films.....                                                                                          | 4  |
| Fig. S4 HRTEM image of Ni@C.....                                                                                                              | 4  |
| Fig. S5 Raman spectrum of Ni@C and hierarchical-porous NiO@C .....                                                                            | 5  |
| Fig. S6 TEM images of A-10, A-30 and A-60.....                                                                                                | 5  |
| Fig. S7 Elemental mapping of A-10, A-30 and A-60.....                                                                                         | 6  |
| Fig. S8 X-ray photoelectron spectroscopy (XPS) of different films.....                                                                        | 6  |
| Fig. S9 Digital photographs of HA-25 film electrode at different states.....                                                                  | 7  |
| Fig. S10 Schematic illustration for HA-25-based number “6” film.....                                                                          | 7  |
| Fig. S11 In situ transmittance responses (at 550 nm) for HA-20 and HA-30 films in 1 M KOH solution measured between 0 and 0.6 V bias.....     | 7  |
| Fig. S12 In situ transmittance responses (at 550 nm) for A-10, A-30 and A-60 films in 1 M KOH solution measured between 0 and 0.6 V bias..... | 8  |
| Fig. S13 The Nyquist plots and corresponding simulation results (fitting lines) for HA-20 and HA-30 films measured in 1 M KOH solution.....   | 8  |
| Fig. S14 The Nyquist plots and corresponding simulation results (fitting lines) for A-10 and A-30 films measured in 1 M KOH solution.....     | 8  |
| Fig. S15 Cyclic voltammogram curves of different films.....                                                                                   | 9  |
| Fig. S16 Coloration efficiency of HA-20 and HA-30 films in 1 M KOH solution.....                                                              | 10 |
| Fig. S17 Coloration efficiency of A-10 and A-30 films in 1 M KOH solution.....                                                                | 10 |
| Supplementary Tables.....                                                                                                                     | 11 |
| Table S1 Percentage of each element of different NiO@C films from X-ray photoelectron spectroscopy (XPS).....                                 | 11 |
| Table S2 Fitted parameters according to electrochemical impedance spectroscopy of different NiO@C films.....                                  | 11 |

|                                                                                     |    |
|-------------------------------------------------------------------------------------|----|
| Table S3 Comparison of $D_w$ and $D_{cv}$ for different NiO@C films.....            | 12 |
| Table S4 Comparison of EC performances of NiO and other inorganic EC materials..... | 12 |
| Supplementary Movies.....                                                           | 12 |
| Supplementary references.....                                                       | 13 |

## Supplementary discussion

### S1. Thermogravimetric analysis :

As shown in Fig. S1, the TGA trace of Ni@C shows a trend of increases initially and decreases afterwards. The weight gain from 290 °C to 390 °C owing to the process of metal oxidation; The followed weight loss after 390 °C because of the carbon decomposition.

For Ni-MOF: The first weight loss (about 5%) before 200 °C due to the volatilization of embedded solvent molecules; Then the second weight loss (about 50%) from 340 °C to 390 °C related to the rapid decomposition of Ni-MOF.

### S2. Calculation process of $D_w$ and $D_{cv}$ :

**Calculation process for  $D_w$  according to the equation S1 (Fick's law).**

$$D_w = R^2 T^2 / 2 S^2 n^4 F^4 C^2 \sigma^2 \quad (S1)$$

Where R is the gas constant, T is the absolute temperature, S is the effective working area, F is the Faraday constant, n is the number of electrons, C is molar concentrations of ions and  $\sigma$  represents the Warburg constant.

**Calculation process for  $D_{cv}$  according to the equation S2 (Randles–Sevcik equation).**

$$i_p = 2.687 \times 10^5 \times n^{3/2} \times D_{cv}^{1/2} \times C \times S \times v^{1/2} \quad (S2)$$

In the above equation,  $i_p$  is the peak current density, n is the number of electrons, C is the concentration of active OH<sup>-</sup> ions, S is the surface area and v is the potential sweep rate.

## Supplementary Figures

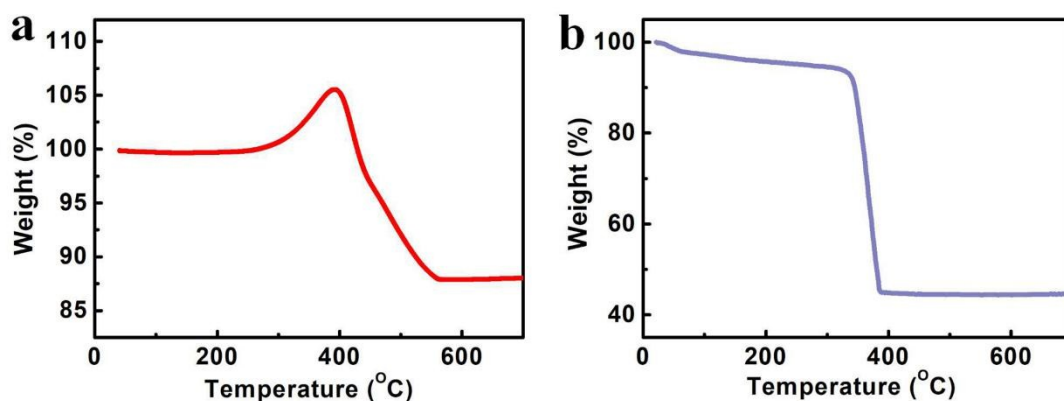

**Fig. S1** TGA traces of (a) Ni@C powder, (b) Ni-MOF powder at the heating rate of 10 °C/ min in air atmosphere.

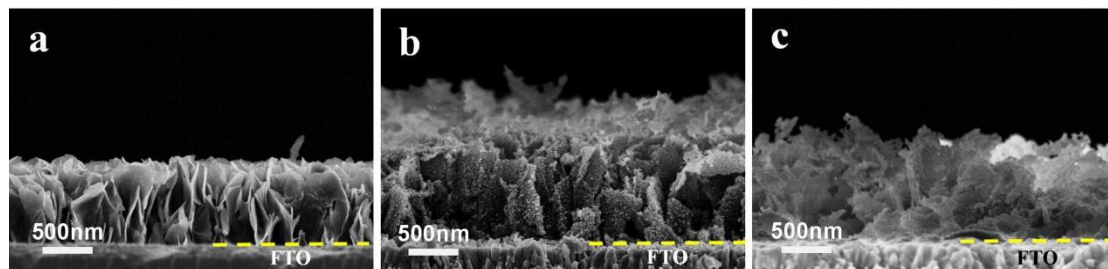

**Fig. S2** Cross-sectional SEM images of (a) Ni-MOF, (b) Ni@C and (c) hierarchical-porous NiO@C layer on FTO glass.

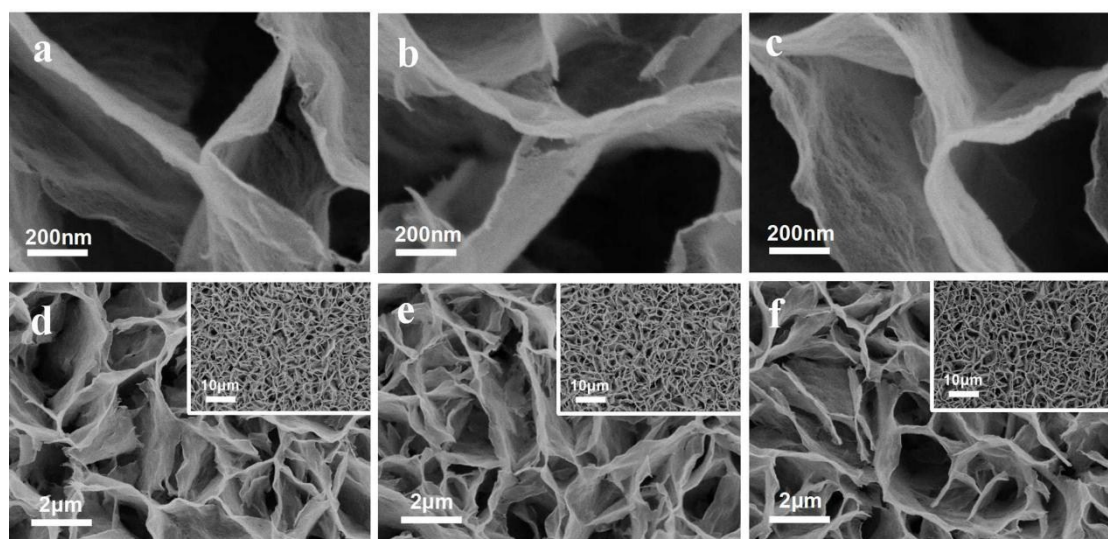

**Fig. S3** SEM images of (a, d) A-10, (b, e) A-30 and (c, f) A-60 films.

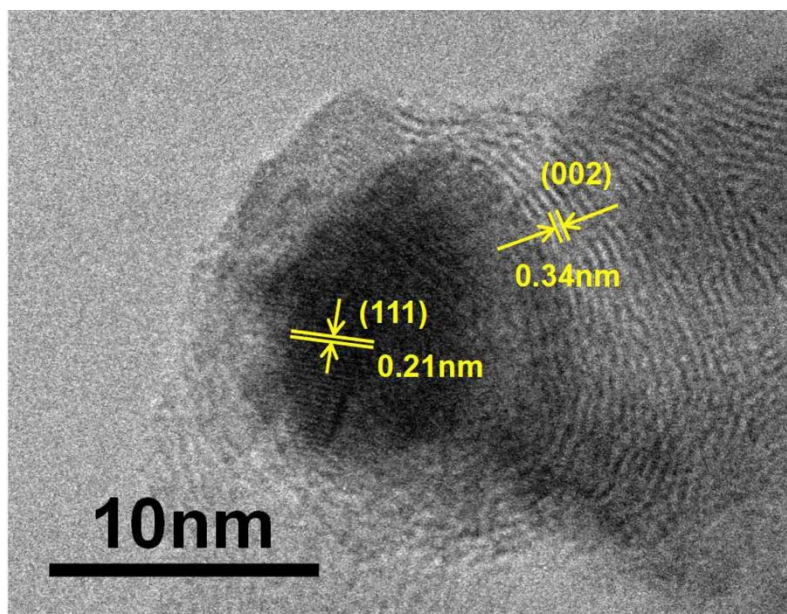

Fig. S4 HRTEM image of Ni@C.

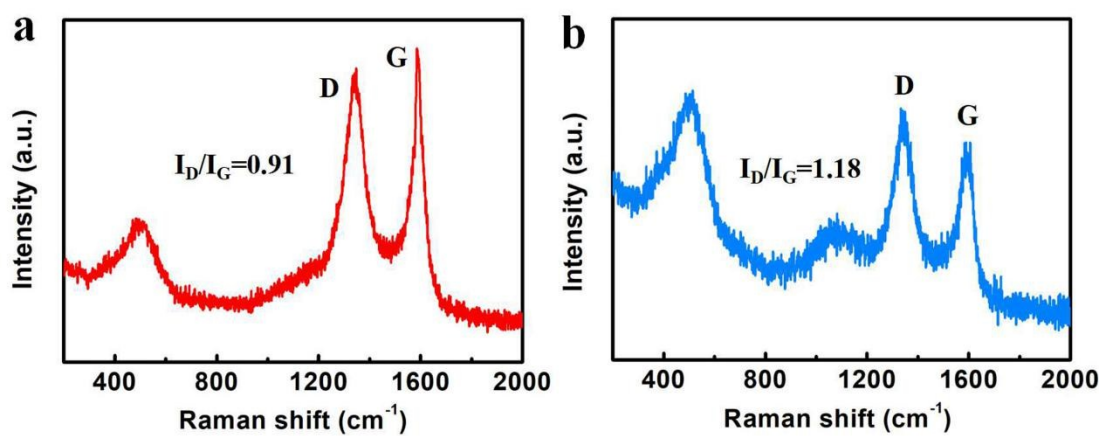

Fig. S5 Raman spectrum of (a) Ni@C and (b) hierarchical-porous NiO@C.



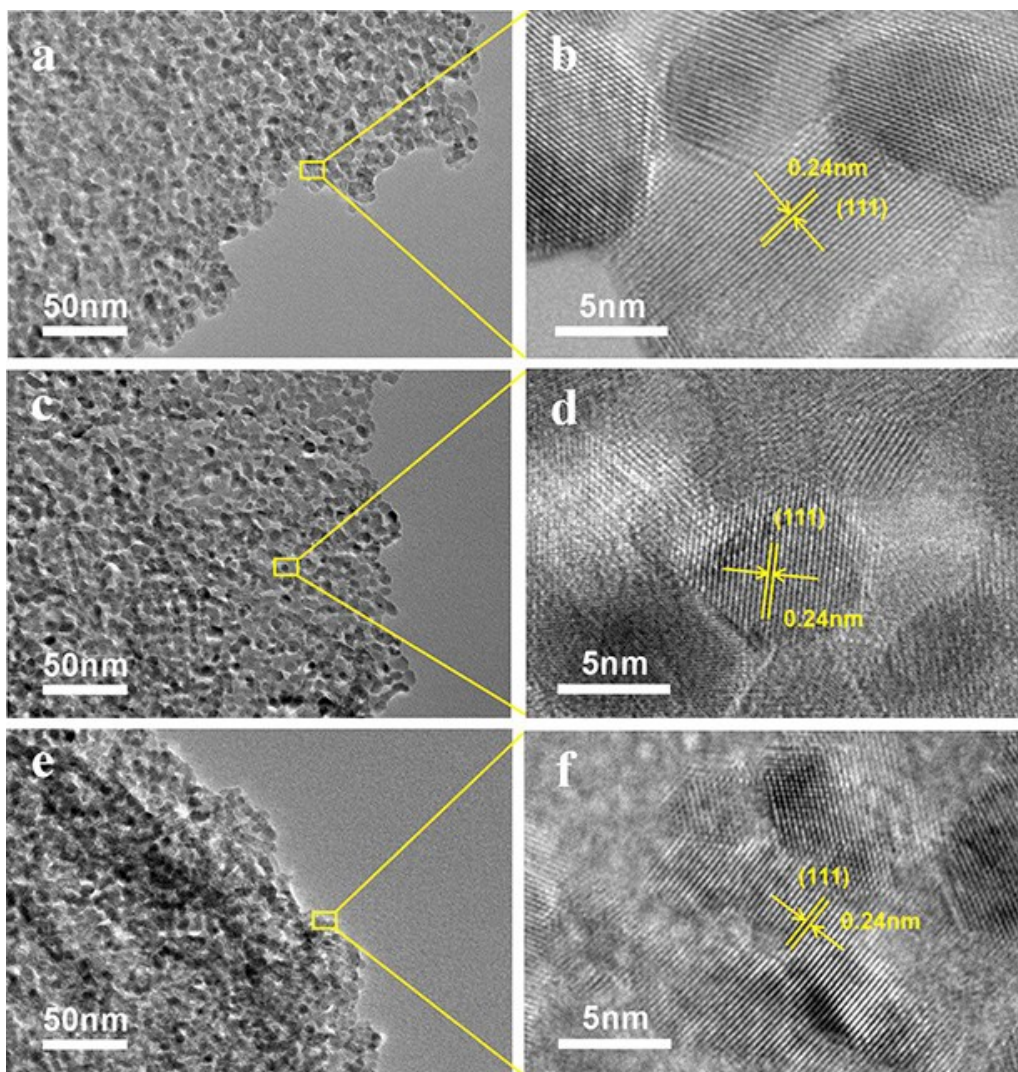

Fig. S6 TEM images of (a, b) A-10, (c, d) A-30 and (e, f) A-60.

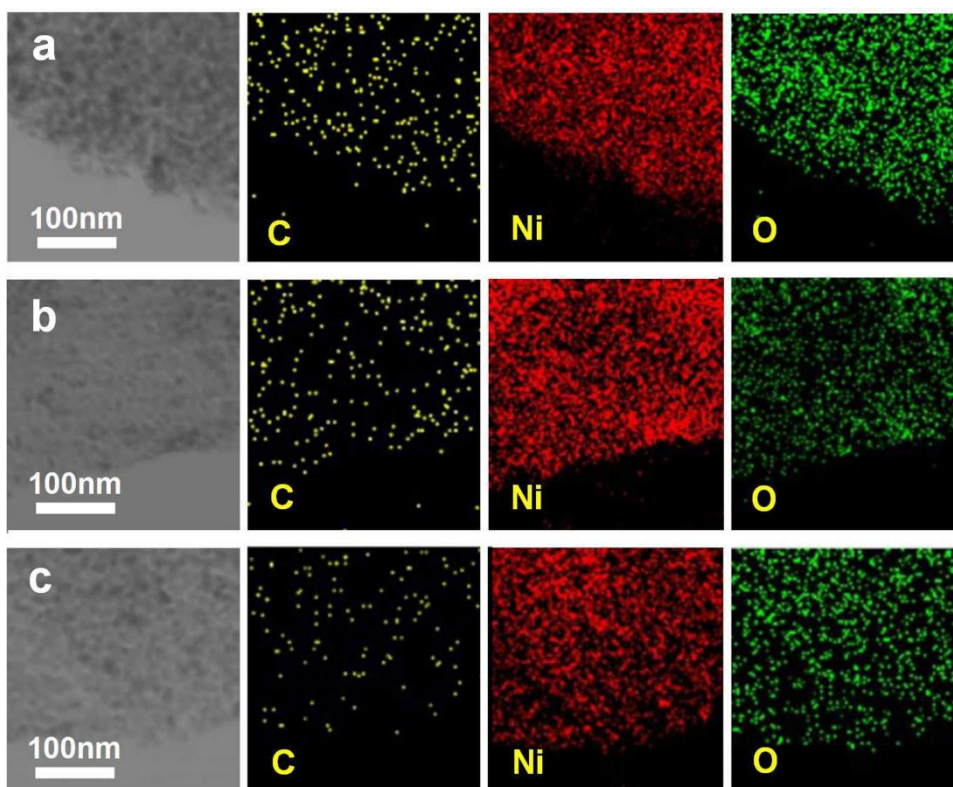

**Fig. S7** Elemental mapping of (a) A-10, (b) A-30 and (c) A-60.

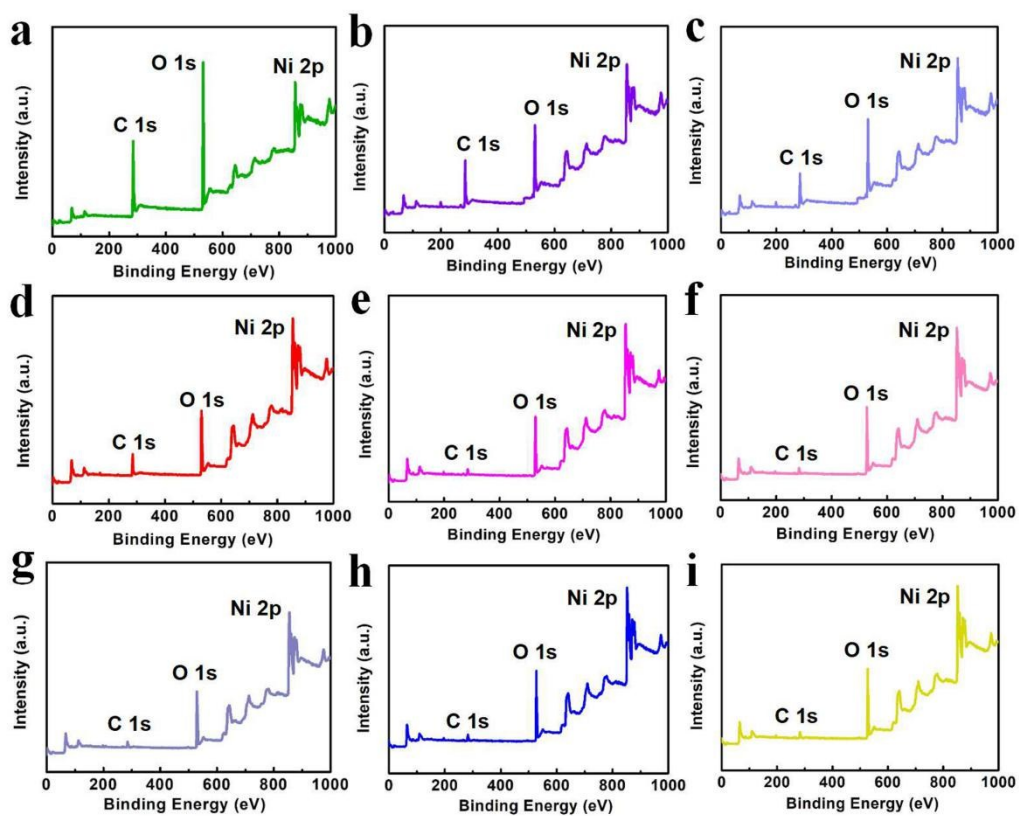



**Fig. S8** X-ray photoelectron spectroscopy (XPS) of (a) PTA-Ni-MOF; (b) HA-15; (c) HA-20; (d) HA-25; (e) HA-30; (f) HA-60; (g) A-10; (h) A-30 and (i) A-60.

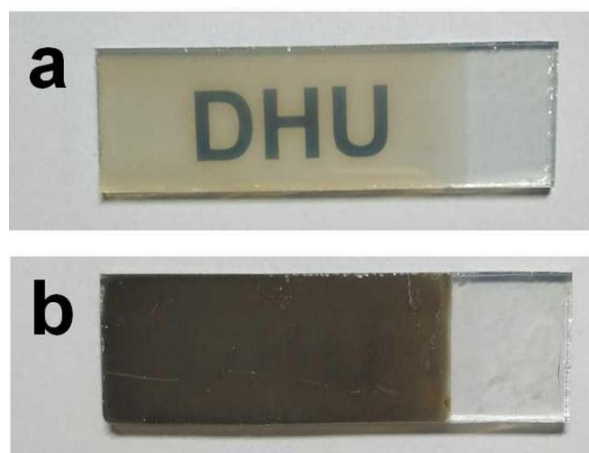

**Fig. S9** Digital photographs of HA-25 film electrode at (a) bleached state and (b) colored state.

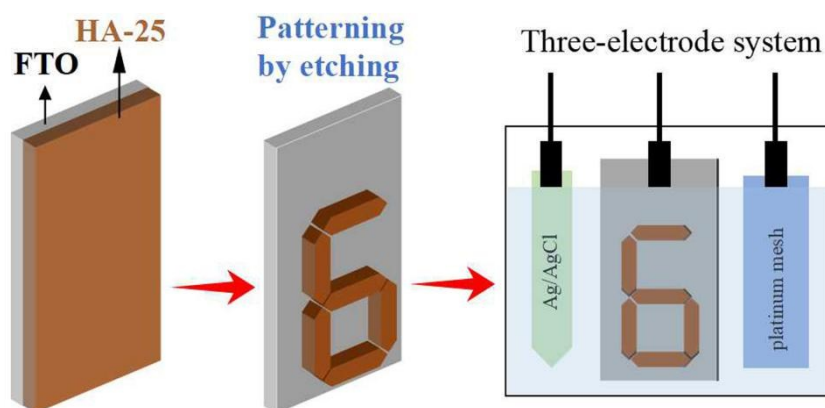

**Fig. S10** Schematic illustration for HA-25-based number "6" film.

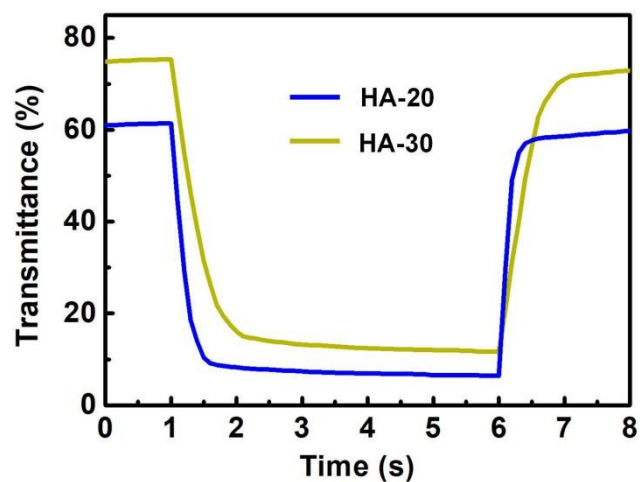

**Fig. S11** In situ transmittance responses (at 550 nm) for HA-20 and HA-30 films in 1 M KOH solution measured between 0 and 0.6 V bias.

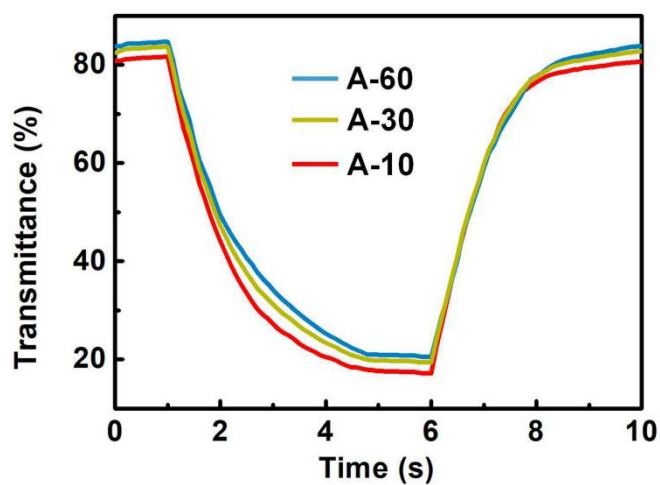

**Fig. S12** In situ transmittance responses (at 550 nm) for A-10, A-30 and A-60 films in 1 M KOH solution measured between 0 and 0.6 V bias.

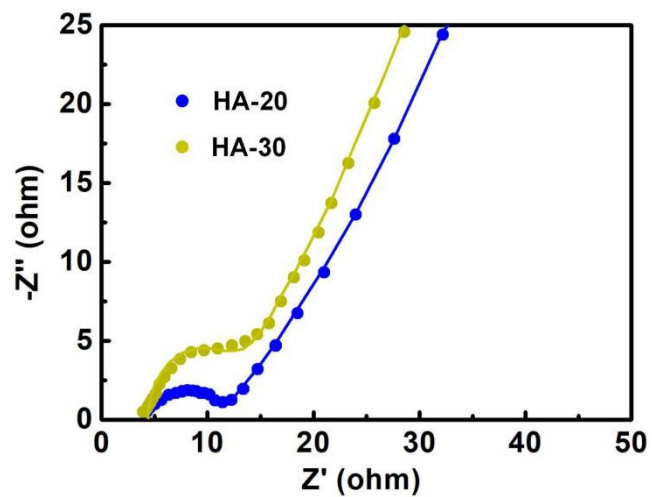

**Fig. S13** The Nyquist plots and corresponding simulation results (fitting lines) for HA-20 and HA-30 films measured in 1 M KOH solution.

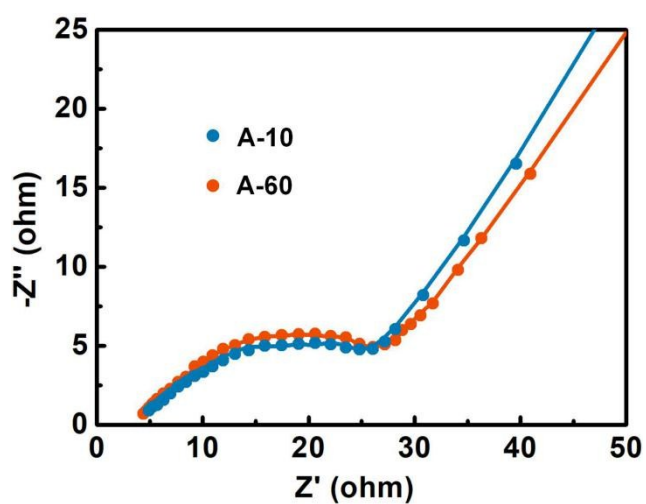

**Fig. S14** The Nyquist plots and corresponding simulation results (fitting lines) for A-10 and A-30 films measured in 1 M KOH solution.

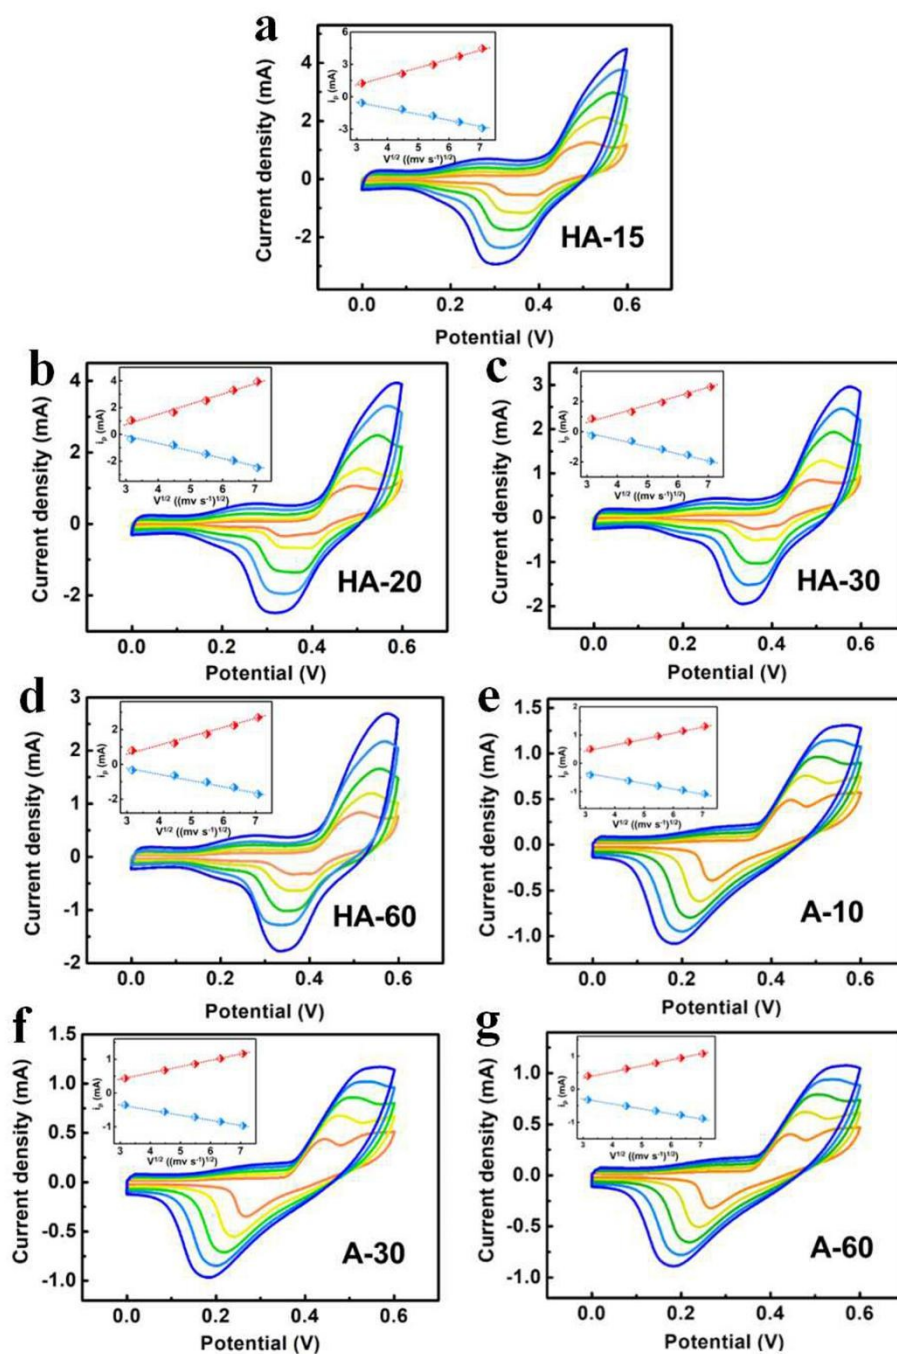

**Fig. S15** Cyclic voltammogram curves of (a) HA-15; (b) HA-20; (c) HA-30; (d) HA-60; (e) A-10; (f) A-30 and (g) A-60 films measured in 1M KOH solution. Scan rates: 10, 20, 30, 40 and 50 mV/s.

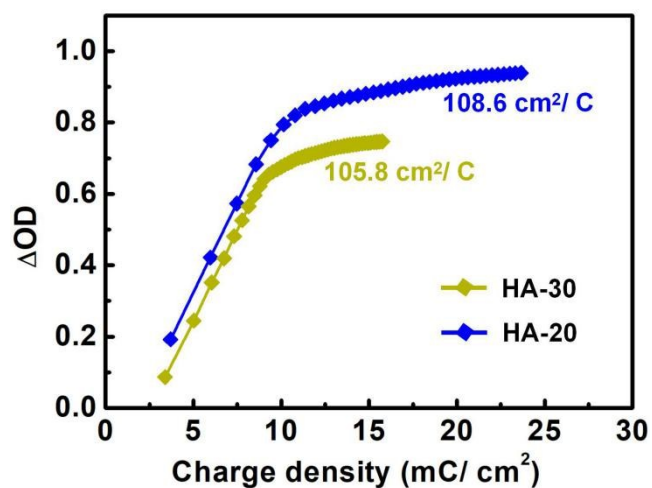

**Fig. S16** Coloration efficiency of HA-20 and HA-30 films in 1 M KOH solution.

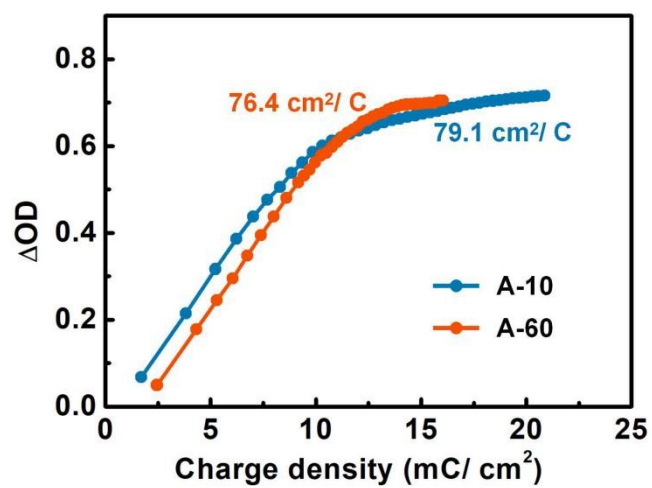

**Fig. S17** Coloration efficiency of A-10 and A-30 films in 1 M KOH solution.



## Supplementary Tables

**Table S1** Percentage of each element of different NiO@C films from X-ray photoelectron spectroscopy (XPS).

| Films | Atomic% (C) | Atomic% (O) | Atomic% (Ni) |
|-------|-------------|-------------|--------------|
| HA-15 | 29.74       | 39.51       | 30.75        |
| HA-20 | 19.15       | 43.59       | 37.26        |
| HA-25 | 11.42       | 46.44       | 42.13        |
| HA-30 | 6.01        | 47.97       | 46.02        |
| HA-60 | 3.96        | 48.54       | 47.5         |
| A-10  | 5.05        | 47.36       | 47.59        |
| A-30  | 4.42        | 48.03       | 47.55        |
| A-60  | 3.77        | 48.62       | 47.61        |

**Table S2** Fitted parameters according to electrochemical impedance spectroscopy of different NiO@C films.

| Films | $R_s$ ( $\Omega$ ) | $R_{ct}$ ( $\Omega$ ) | $\sigma$ ( $\Omega \times s^{-1/2}$ ) |
|-------|--------------------|-----------------------|---------------------------------------|
| HA-15 | 4.03               | 4.24                  | 38.65                                 |
| HA-20 | 4.11               | 6.82                  | 42.50                                 |
| HA-25 | 4.26               | 7.59                  | 45.90                                 |
| HA-30 | 4.40               | 12.51                 | 48.16                                 |
| HA-60 | 4.49               | 15.36                 | 51.09                                 |

|      |      |       |        |
|------|------|-------|--------|
| A-10 | 4.67 | 42.65 | 113.53 |
| A-30 | 4.75 | 45.14 | 118.69 |
| A-60 | 4.81 | 45.78 | 123.04 |

**Table S3** Comparison of  $D_w$  of different NiO@C films calculated from Fick's law and  $D_{cv}$  calculated from Randles–Sevcik equation.

| Films | $D_w$ calculated from Fick's law ( $\text{cm}^2/\text{s}$ ) | $D_{cv}$ calculated from R–S equation ( $\text{cm}^2/\text{s}$ ) |
|-------|-------------------------------------------------------------|------------------------------------------------------------------|
| HA-15 | $1.85 \times 10^{-7}$                                       | $1.37 \times 10^{-7} / 2.94 \times 10^{-8}$                      |
| HA-20 | $1.53 \times 10^{-7}$                                       | $1.08 \times 10^{-7} / 2.55 \times 10^{-8}$                      |
| HA-25 | $1.31 \times 10^{-7}$                                       | $9.72 \times 10^{-8} / 1.76 \times 10^{-8}$                      |
| HA-30 | $1.19 \times 10^{-7}$                                       | $9.55 \times 10^{-8} / 1.57 \times 10^{-8}$                      |
| HA-60 | $1.06 \times 10^{-7}$                                       | $9.08 \times 10^{-8} / 1.44 \times 10^{-8}$                      |
| A-10  | $2.14 \times 10^{-8}$                                       | $1.21 \times 10^{-8} / 7.73 \times 10^{-9}$                      |
| A-30  | $1.97 \times 10^{-8}$                                       | $9.93 \times 10^{-9} / 7.12 \times 10^{-9}$                      |
| A-60  | $1.82 \times 10^{-8}$                                       | $9.64 \times 10^{-9} / 6.89 \times 10^{-9}$                      |

**Table S4** Comparison of EC performances of NiO and other inorganic EC materials.

| EC materials | Coloring/bleaching time | CE                               | Cycling stability | Reference<br>s |
|--------------|-------------------------|----------------------------------|-------------------|----------------|
| NiO          | 7.2/6.7 s               | $76 \text{ cm}^2 \text{ C}^{-1}$ | 2200 cycles       | 1              |

|                   |                    |                                            |                                 |   |
|-------------------|--------------------|--------------------------------------------|---------------------------------|---|
| NiO               | ~5 s               | 88 cm <sup>2</sup> C <sup>-1</sup>         | NA                              | 2 |
| NiO               | < 0.1 s            | ~45 cm <sup>2</sup> C <sup>-1</sup>        | 1000 cycles                     | 3 |
| WO <sub>3</sub>   | 5.8/1 s            | 51.4 cm <sup>2</sup> C <sup>-1</sup>       | 81.6% after 1000 cycles         | 4 |
| WO <sub>3</sub>   | 0.93/1.27s         | 71.8 cm <sup>2</sup> C <sup>-1</sup>       | 450 cycles                      | 5 |
| WO <sub>3-x</sub> | 0.9/1 s            | 154 cm <sup>2</sup> C <sup>-1</sup>        | NA                              | 6 |
| Ni/Mg-NDISA       | ~7 s               | ~100 cm <sup>2</sup> C <sup>-1</sup>       | NA                              | 7 |
| <b>This work</b>  | <b>0.46/0.25 s</b> | <b>113.5 cm<sup>2</sup> C<sup>-1</sup></b> | <b>90.1% after 20000 cycles</b> |   |

## Supplementary Movies

**Movie S1** HA-25 film measured in three electrode system powered by electrochemical workstation.

**Movie S2** Digital display device powered by commercial batteries.

## Supplementary References

- 1 G.-F. Cai, J.-P. Tu, J. Zhang, Y.-J. Mai, Y. Lu, C.-D. Gu and X.-L. Wang, *Nanoscale*, 2012, **4**, 5724-5730.
- 2 D. S. Dalavi, R. S. Devan, R. S. Patil, Y. R. Ma, M. G. Kang, J. H. Kim and P. S. Patil, *J. Mater. Chem. A.*, 2013, **1**, 1035-1039.
- 3 M. R. J. Scherer and U. Steiner, *Nano Lett.*, 2013, **13**, 3005-3010.
- 4 B.-R. Koo and H.-J. Ahn, *Nanoscale*, 2017, **9**, 17788-17793.
- 5 Z. Q. Xie, Q. Q. Zhang, Q. Q. Liu, J. Zhai and X. G. Diao, *Thin Solid Films*, 2018, **653**, 188-193.
- 6 S. Cong, Y. Y. Tian, Q. W. Li, Z. G. Zhao, F. X. Geng, *Adv. Mater.*, 2014, **26**, 4260-4267.
- 7 K. AlKaabi, C. R. Wade and M. Dincă, *Chem.*, 2016, **1**, 264-272.
